# Supplementary material for: Ascorbic Acid-Modified Silicones: Crosslinking and Antioxidant Delivery
Source: MDPI journal article supplement (doi:10.3390/polym14225040), 2022-11-21
Supplement: s1 [file s1]

# Ascorbic Acid-Modified Silicones: Crosslinking and Antioxidant Delivery

Guanhua Lu <sup>1</sup>, Akop Yepremyen <sup>1</sup>, Khaled Tamim <sup>1</sup>, Yang Chen <sup>1</sup> and Michael A. Brook <sup>1,\*</sup>

Supporting Information

Table S1. Experimental details of the synthesis of benzylated, acryl ascorbic acid -modified silicones.

| Sample Name    | % ACR to NH <sub>2</sub> | mass of P-22 (g) | Volume of 0.02 g/mL Bn <sub>2</sub> Asc stock solution |
|----------------|--------------------------|------------------|--------------------------------------------------------|
| <b>P22-2</b>   | 2.00%                    | 2.46             | 2.5                                                    |
| <b>P22-5</b>   | 5%                       | 0.99             | 2.5                                                    |
| <b>P22-10</b>  | 10%                      | 0.49             | 2.5                                                    |
| <b>P22-15</b>  | 15%                      | 0.33             | 2.5                                                    |
| <b>P22-20</b>  | 20%                      | 0.25             | 2.5                                                    |
| <b>P22-50</b>  | 50%                      | 0.10             | 2.5                                                    |
| <b>P22-75</b>  | 75%                      | 0.07             | 2.5                                                    |
| <b>P22-100</b> | 100%                     | 0.05             | 2.5                                                    |
| <b>P21-25</b>  | 25%                      | 1.04             | 2.5                                                    |

Table S2 DPPH Assay sample preparation weight

| <b>P21-25</b>              |                      | <b>P22-2</b>               |                      | <b>P22-10</b>              |                      |
|----------------------------|----------------------|----------------------------|----------------------|----------------------------|----------------------|
| AA group concentration (M) | Elastomer Weight (g) | AA group concentration (M) | Elastomer Weight (g) | AA group concentration (M) | Elastomer Weight (g) |
| 0.0212                     | 0.0500               | 0.0212                     | 0.0500               | 0.0212                     | 0.0500               |
| 0.0106                     | 0.0250               | 0.0106                     | 0.0250               | 0.0106                     | 0.0250               |
| 0.0042                     | 0.0100               | 0.0042                     | 0.0100               | 0.0042                     | 0.0100               |
| 0.0021                     | 0.0050               | 0.0021                     | 0.0050               | 0.0021                     | 0.0050               |

Table S3 DPPH Assay result summary

| Absorbance at 520 nm (n=3) |         |           |         |           |         |           |         |           |         |           |  |
|----------------------------|---------|-----------|---------|-----------|---------|-----------|---------|-----------|---------|-----------|--|
| AA Conc.<br>(M)            | P22-10  |           | P22-2   |           | P21-25  |           | Bn2AA   |           | AA      |           |  |
|                            | Average | Std Error |  |
| 0.002                      | 0.343   | 0.006     | 0.412   | 0.005     | 0.376   | 0.005     | 0.494   | 0.008     | 0.082   | 0.001     |  |
| 0.004                      | 0.274   | 0.004     | 0.426   | 0.008     | 0.312   | 0.003     | 0.481   | 0.010     | 0.081   | 0.001     |  |
| 0.011                      | 0.141   | 0.002     | 0.482   | 0.008     | 0.150   | 0.003     | 0.466   | 0.009     | 0.081   | 0.002     |  |
| 0.021                      | 0.094   | 0.002     | 0.591   | 0.013     | 0.088   | 0.001     | 0.426   | 0.009     | 0.078   | 0.000     |  |
| 0.042                      |         |           |         |           |         |           | 0.385   | 0.006     | 0.078   | 0.001     |  |

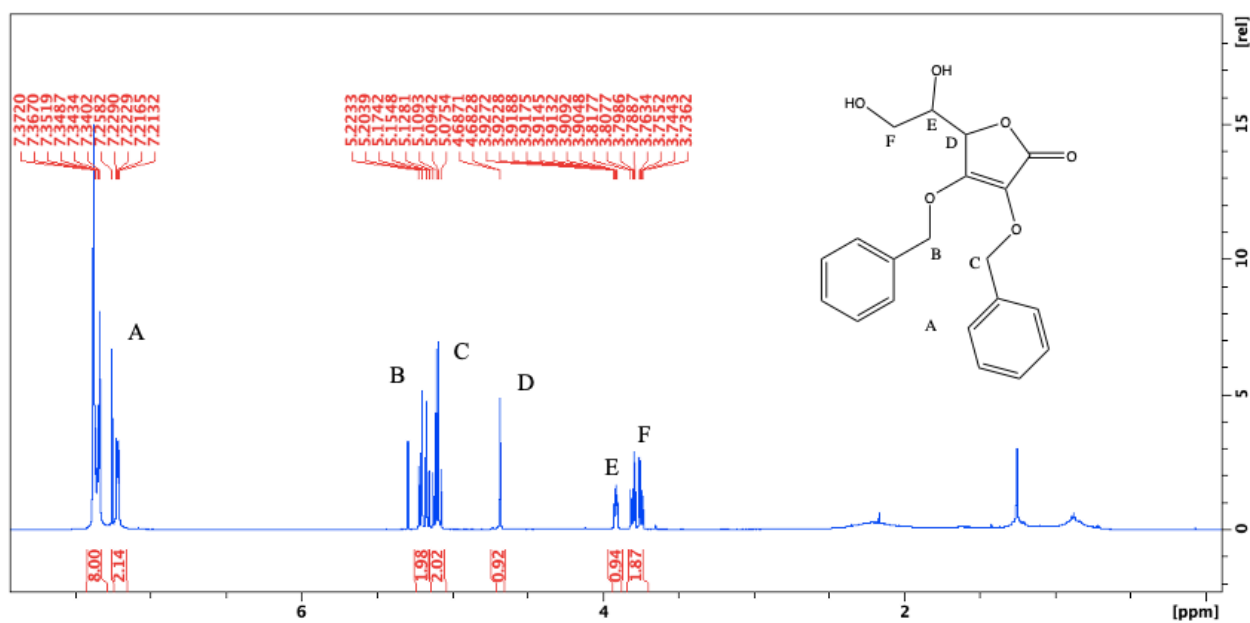

Figure S1. <sup>1</sup>H NMR spectrum of benzylated ascorbic acid **Bn2AA**.

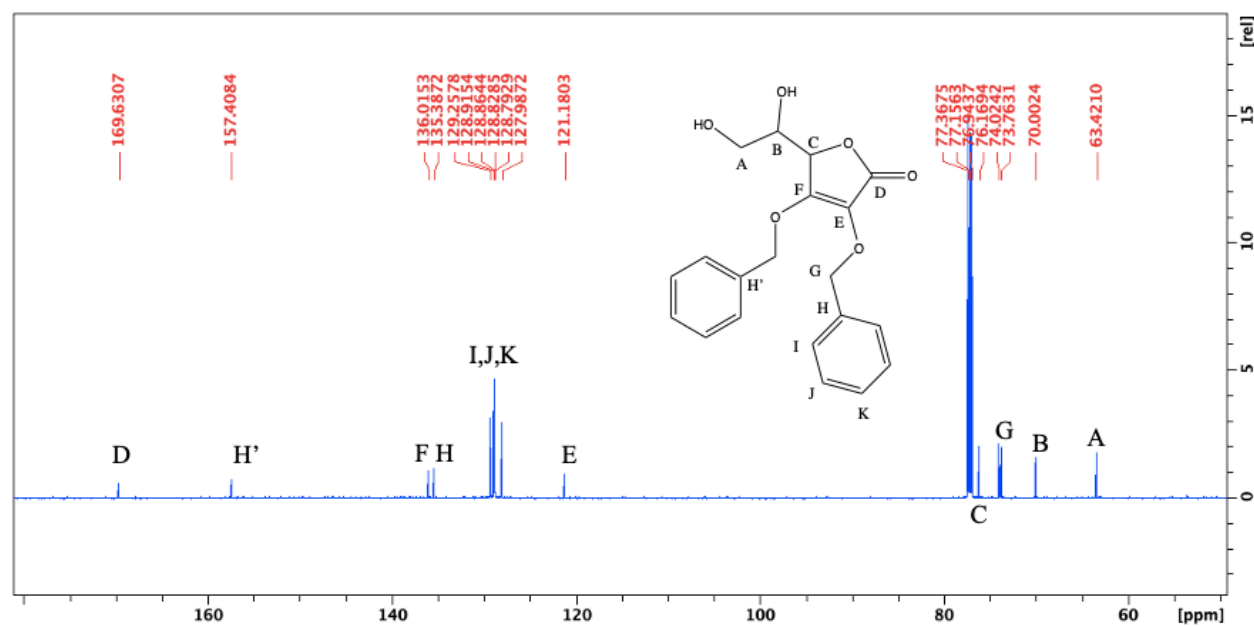

Figure S2.  $^{13}\text{C}$  NMR spectrum of benzylated ascorbic acid **Bn2AA**.

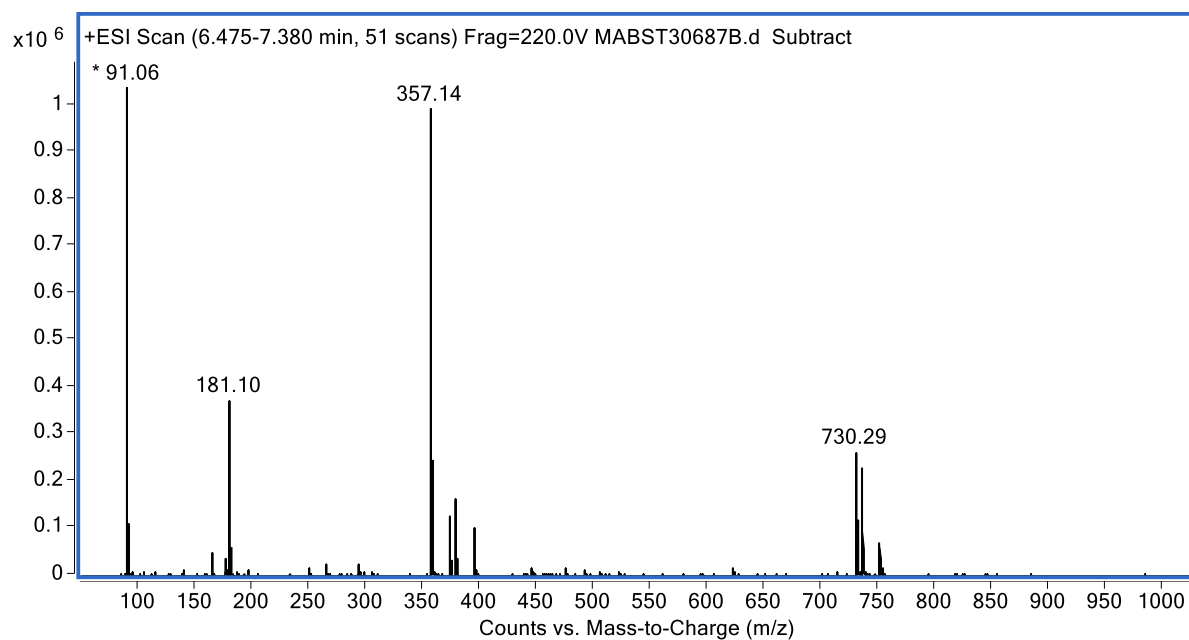

Figure S3. Mass spectrum (ESI, Ve+ mode) of benzylated ascorbic acid Bn2AA. Shown  $[\text{M}+\text{H}]^+$ ,  $[\text{M}+\text{NH}_4]^+$ ,  $[\text{M}+\text{Na}]^+$  and  $[\text{M}+\text{K}]^+$  at  $m/z$  357, 374, 379 and 395 respectively.

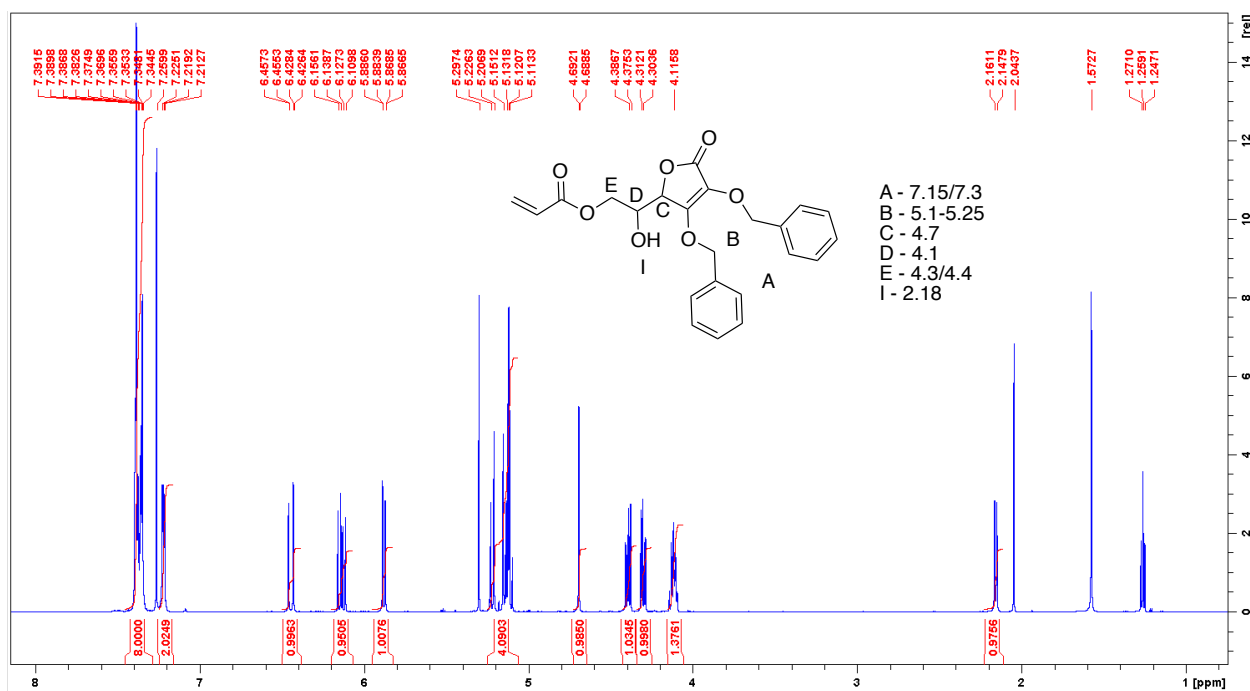

Figure S4.  $^1\text{H}$  NMR of benzylated acryl ascorbic acid **1**.

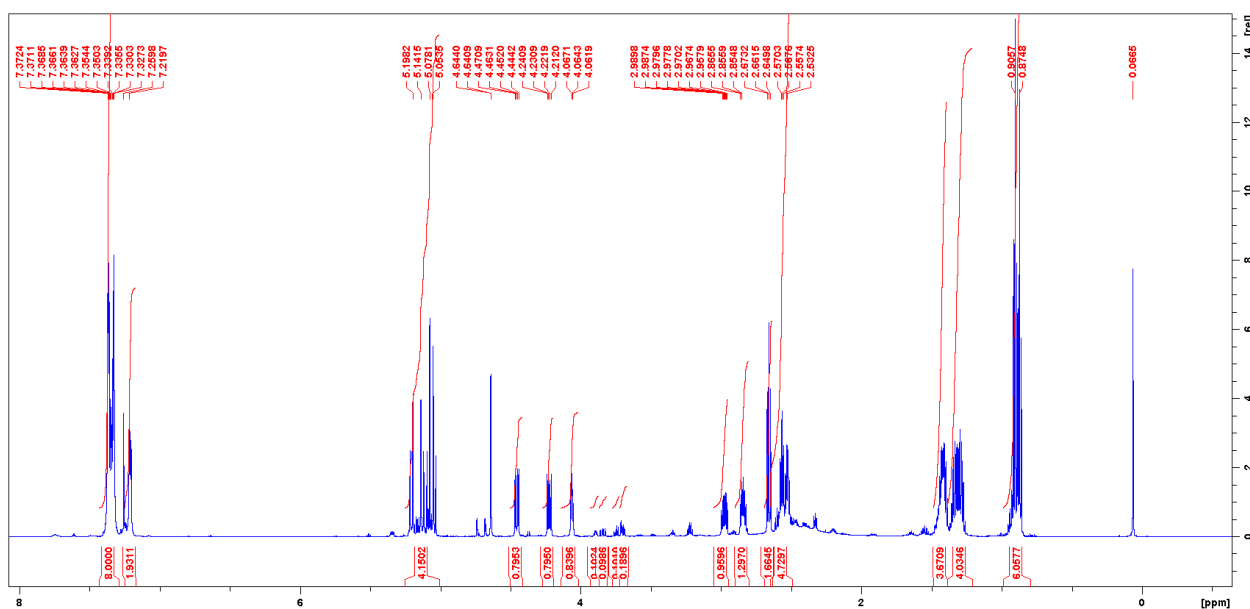

Figure S5. Final product of benzylated acryl ascorbic acid with over excess butyl amine, shown two eq butyl amine was reacted with benzylated acryl ascorbic acid **N2AA**.

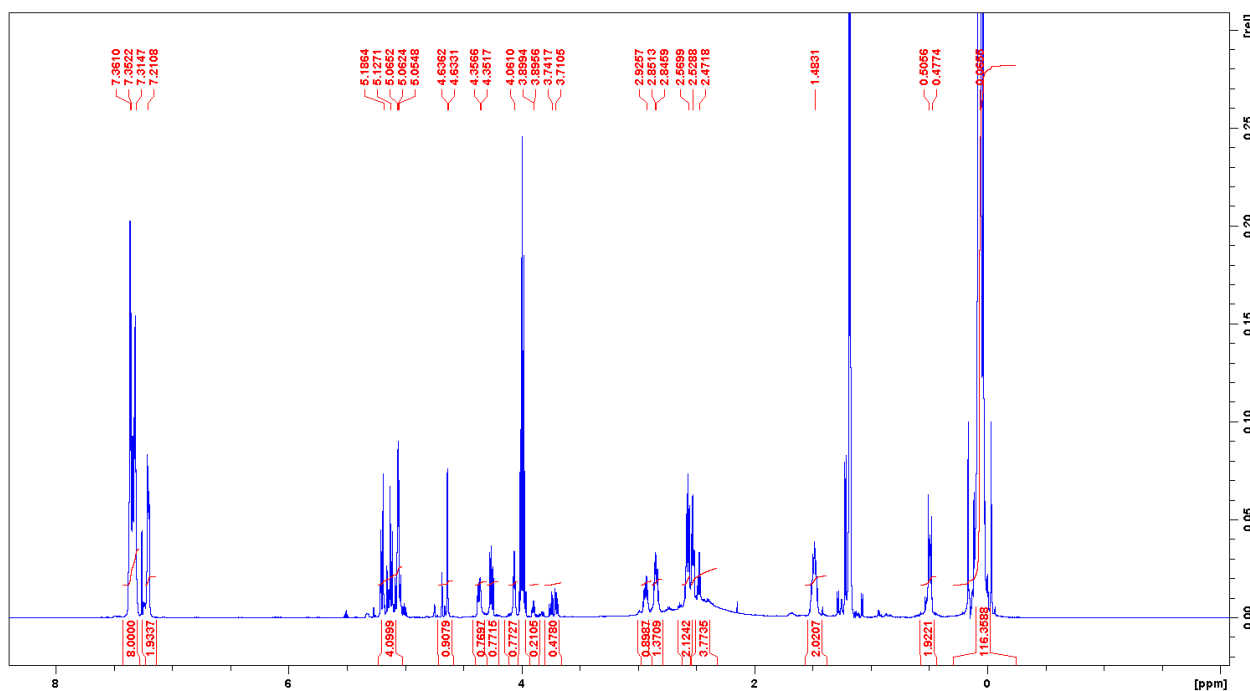

Figure S6. Benzylated acryl ascorbic acid 1-modified T334 reaction in IPA after overnight.

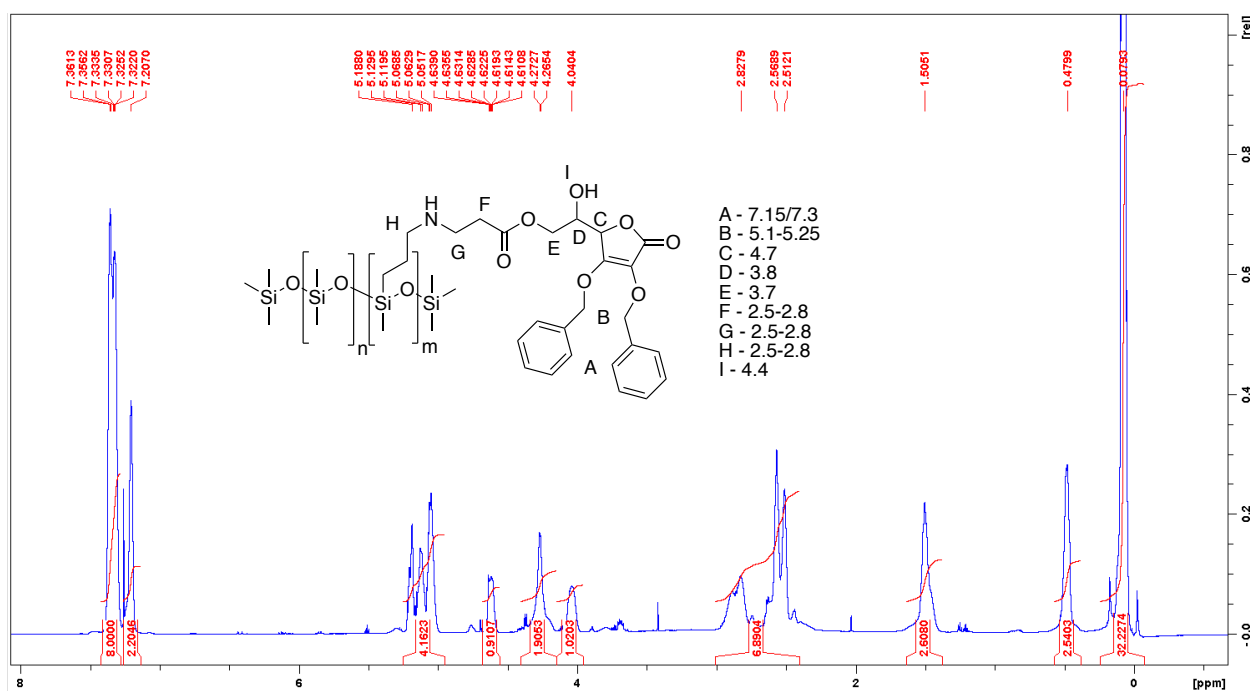

Figure S7 <sup>1</sup>H NMR of benzylated acryl ascorbic acid modified P22-100 reaction in CDCl<sub>3</sub> after 24h.

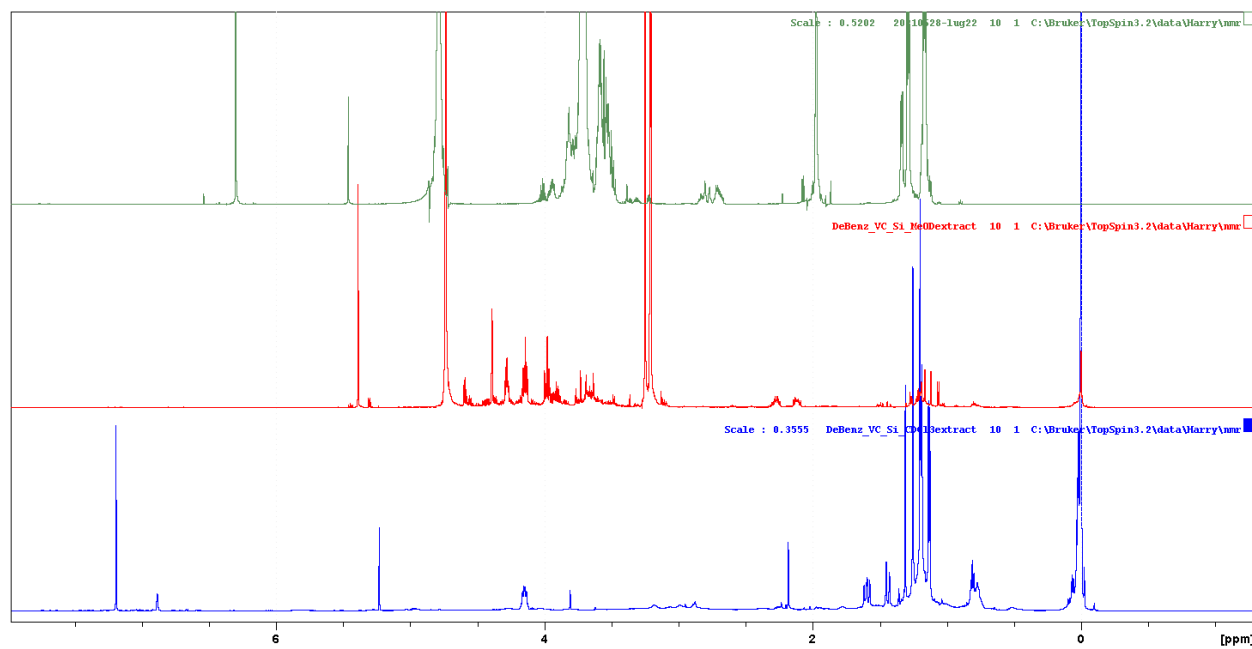

Figure S8. Hydrogenation product of **P22-100** from bottom to top to be CDCl<sub>3</sub> extract, MeOD-*d*<sub>4</sub> extract and D<sub>2</sub>O extract.

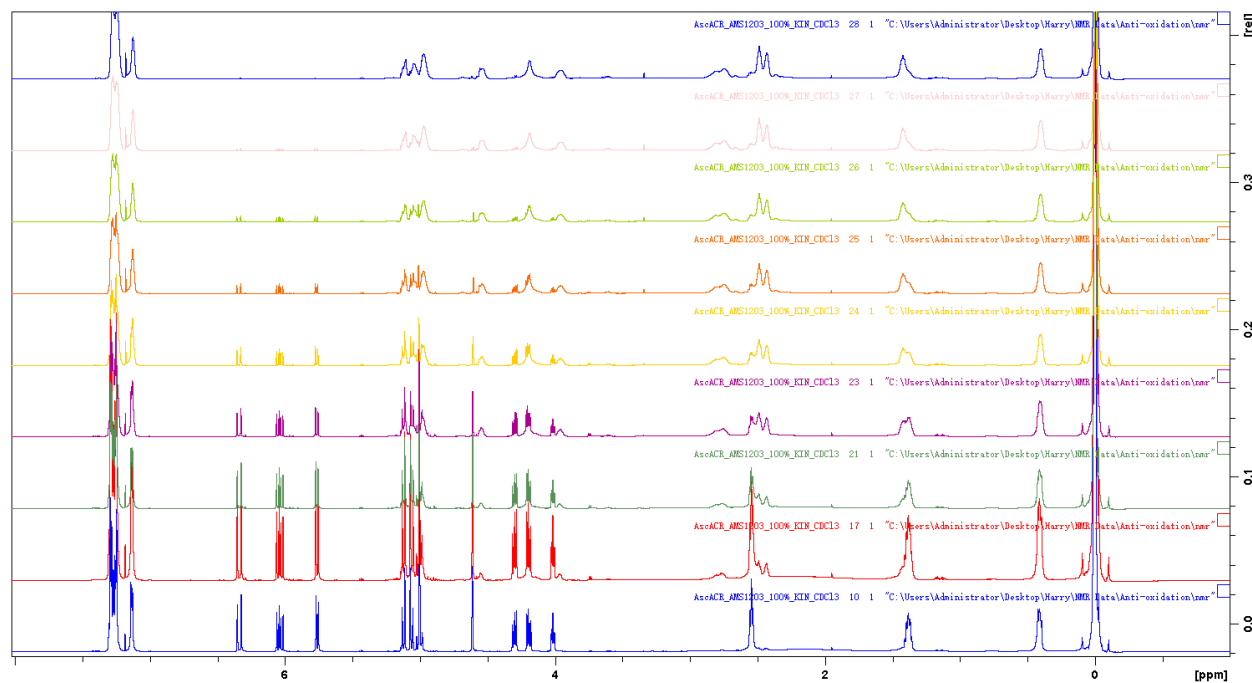

Figure S9. Kinetic study of benzylated acryl ascorbic acid **1** reacting with **P22** in CDCl<sub>3</sub>. Reaction time 0, 15 min, 30 min, 1 h, 2 h, 4 h, 8 h, 12 h, 24 h from bottom to the top.

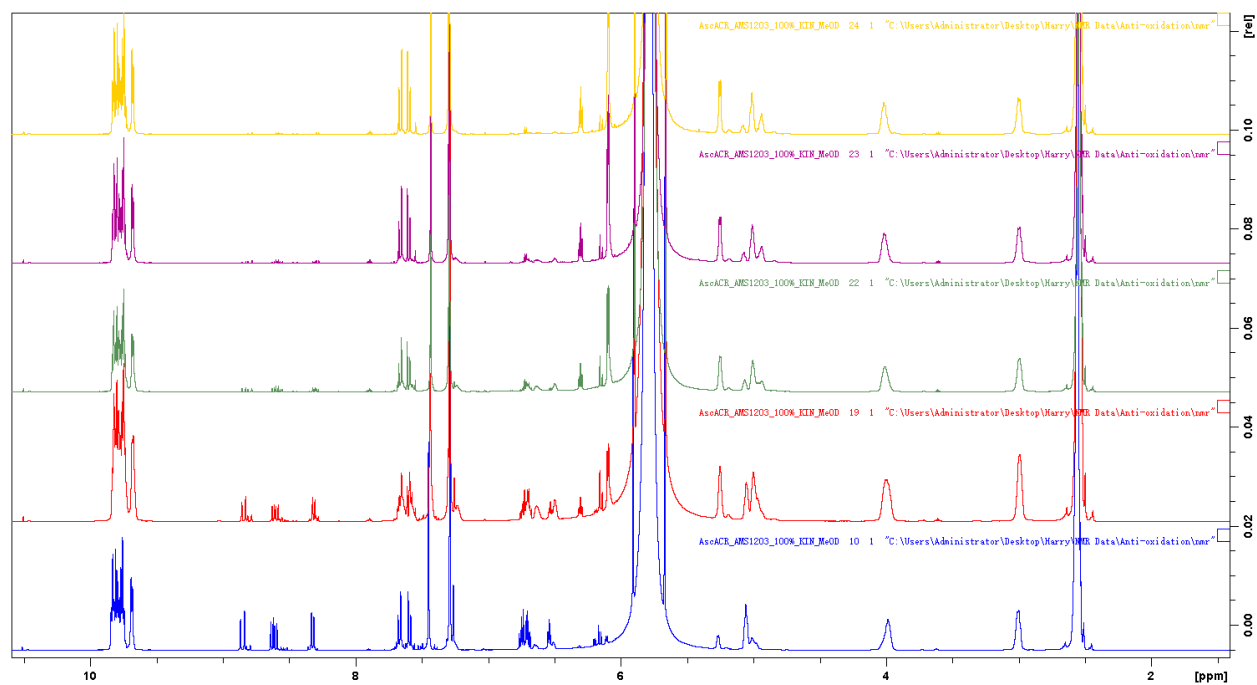

Figure S10. Kinetic study of benzylated acryl ascorbic acid **1** reacting with **P22** in  $\text{MeOD}-d_1$ . Reaction time 0, 15min, 30min, 1h, 2h from bottom to the top.

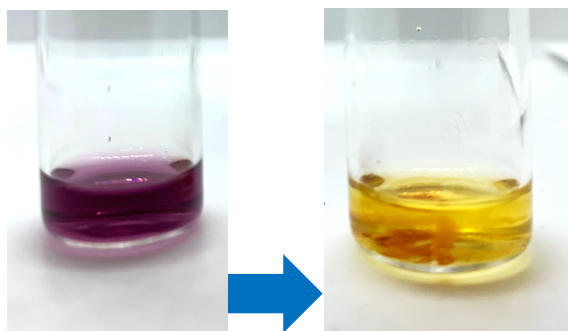

Figure S11. Antioxidant testing: hydrogenated product mixture of **P22-100** before and immediately after addition of DPPH.
